# Supplementary material for: Race, Ethnicity, Income Concentration and 10-Year Change in Urban Greenness in the United States
Source: Int J Environ Res Public Health. 2017 Dec 10;14(12):1546. doi: 10.3390/ijerph14121546 (PMC5750964; doi:10.3390/ijerph14121546)

# Supplementary Materials: Race, Ethnicity, Income Concentration and 10-Year Change in Urban Greenness in the United States

Joan A. Casey <sup>1,\*</sup>, Peter James <sup>2</sup>, Lara Cushing <sup>3</sup>, Bill M. Jesdale <sup>4</sup> and Rachel Morello-Frosch <sup>5,\*</sup>

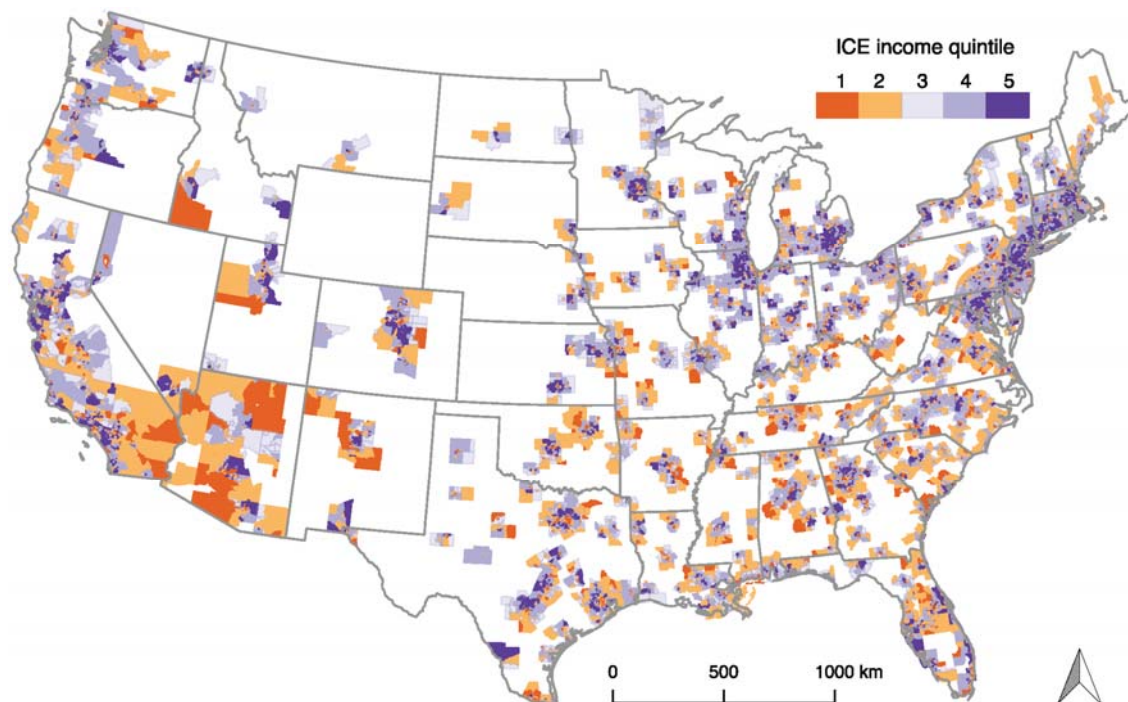

**Figure S1.** Census tract level Index of Concentration at the Extremes (ICE) for income, 2000. ICE based on metro-area 80<sup>th</sup> and 20<sup>th</sup> percentile income cut points (Quintile 1= highest poverty concentration and Quintile 5 highest affluence concentration).

**Table S1.** Association between 2000 census characteristics and annual average greenness: 2001 NDVI and change in NDVI 2001–2011, contiguous U.S. census tracts.

|                                                   | Model 1 <sup>a</sup>    | Model 2 <sup>b</sup>    |
|---------------------------------------------------|-------------------------|-------------------------|
|                                                   | $\beta$ (95% CI)        | $\beta$ (95% CI)        |
| <b>2001 NDVI<sup>c</sup></b>                      |                         |                         |
| Race/ethnicity <sup>d,e</sup>                     |                         |                         |
| Non-Hispanic                                      |                         |                         |
| American Indian                                   | −0.002 (−0.003, −0.002) | 0 (−0.001, 0)           |
| Asian                                             | −0.011 (−0.010, −0.012) | −0.007 (−0.008, −0.006) |
| Black                                             | −0.008 (−0.009, −0.007) | 0.001 (0, 0.002)        |
| White                                             | 0.036 (0.034, 0.037)    | 0.016 (0.010, 0.014)    |
| Hispanic                                          | −0.023 (−0.024, −0.022) | −0.010 (−0.011, −0.009) |
| Index of Concentration at the Extremes for income |                         |                         |
| Quintile 1<br>(highest poverty concentration)     |                         | −0.023 (−0.025, −0.020) |
| Quintile 2                                        |                         | −0.012 (−0.014, −0.010) |
| Quintile 3                                        |                         | −0.007 (−0.009, −0.005) |
| Quintile 4                                        |                         | −0.003 (0.005, −0.002)  |
| Quintile 5<br>(highest affluence concentration)   |                         | Reference               |
| <b>Change in NDVI (2001–2011)<sup>c</sup></b>     |                         |                         |
| Race/ethnicity <sup>c,d</sup>                     |                         |                         |
| Non-Hispanic                                      |                         |                         |
| American Indian                                   | 0 (0, 0)                | 0 (0, 0)                |
| Asian                                             | 0 (0, 0)                | 0 (0, 0)                |
| Black                                             | −0.001 (−0.001, 0)      | 0 (−0.001, 0)           |
| White                                             | 0.004 (0.003, 0.004)    | 0.002 (0.002, 0.003)    |
| Hispanic                                          | −0.002 (−0.003, −0.002) | −0.002 (−0.002, −0.001) |
| Index of Concentration at the Extremes for income |                         |                         |
| Quintile 1<br>(highest poverty concentration)     |                         | −0.003 (−0.004, −0.002) |
| Quintile 2                                        |                         | −0.002 (−0.003, −0.001) |
| Quintile 3                                        |                         | −0.002 (−0.003, −0.001) |
| Quintile 4                                        |                         | −0.002 (−0.003, −0.001) |
| Quintile 5<br>(highest affluence concentration)   |                         | Reference               |

<sup>a</sup> Model 1, spatial error model with variance-stabilized weights, adjusted for Omernik ecoregion (Eastern Temperate Forests was the reference group) and annual average county-level rainfall during 2001 (2001 NDVI models) or difference in annual average county-level rainfall between 2001 and 2011 (change in NDVI models). <sup>b</sup> Model 2 was additionally adjusted for 2000 census tract level variables: population density (persons/km<sup>2</sup>), percent renter-occupied housing units, and Index of Concentration at the Extremes for income. <sup>c</sup> Estimated from measures taken during four seasons on January 1, April 7, July 12, and September 30 in 2001 and 2011. <sup>d</sup> Race/ethnicity  $\beta$  coefficients were standardized;  $\beta$  represents the change in NDVI for a 1-SD change in the proportion of the census tract populated by the relevant racial/ethnic group. <sup>e</sup> Reference group for American Indians, Asians, Blacks, and Hispanics was non-Hispanic Whites; Hispanics were the reference group for non-Hispanic Whites

**Table S2.** Main analysis repeated with row-standardized weights; Association between 2000 census characteristics and summertime greenness: 2001 NDVI and change in NDVI 2001–2011, contiguous U.S. census tracts.

|                                                   | Model 1 <sup>a</sup>    | Model 2 <sup>b</sup>    |
|---------------------------------------------------|-------------------------|-------------------------|
|                                                   | $\beta$ (95% CI)        | $\beta$ (95% CI)        |
| <b>2001 NDVI</b>                                  |                         |                         |
| Race/ethnicity <sup>c,d</sup>                     |                         |                         |
| Non-Hispanic                                      |                         |                         |
| American Indian                                   | −0.003 (−0.004, −0.002) | −0.001 (−0.001, −0.002) |
| Asian                                             | −0.013 (−0.014, −0.012) | −0.008 (−0.009, −0.007) |
| Black                                             | −0.013 (−0.015, −0.012) | −0.010 (−0.012, −0.009) |
| White                                             | 0.041 (0.039, 0.044)    | 0.017 (0.015, 0.019)    |
| Hispanic                                          | −0.027 (−0.028, −0.025) | −0.011 (−0.013, −0.001) |
| Index of Concentration at the Extremes for income |                         |                         |
| Quintile 1<br>(highest poverty concentration)     |                         | −0.029 (−0.033, −0.026) |
| Quintile 2                                        |                         | −0.017 (−0.019, −0.014) |
| Quintile 3                                        |                         | −0.007 (−0.009, −0.005) |
| Quintile 4                                        |                         | −0.002 (0.004, 0)       |
| Quintile 5<br>(highest affluence concentration)   |                         | Reference               |
| <b>Change in NDVI (2001–2011)</b>                 |                         |                         |
| Race/ethnicity <sup>c,d</sup>                     |                         |                         |
| Non-Hispanic                                      |                         |                         |
| American Indian                                   | 0 (−0.003, 0.001)       | 0 (0, 0)                |
| Asian                                             | 0 (−0.001, 0.001)       | 0 (0, 0.001)            |
| Black                                             | 0 (−0.001, 0)           | −0.001 (−0.002, 0)      |
| White                                             | 0.003 (0.002, 0.004)    | 0.003 (0.002, 0.005)    |
| Hispanic                                          | −0.002 (−0.003, −0.001) | −0.002 (−0.003, −0.001) |
| Index of Concentration at the Extremes for income |                         |                         |
| Quintile 1<br>(highest poverty concentration)     |                         | 0.001 (−0.001, 0.003)   |
| Quintile 2                                        |                         | 0 (−0.002, 0.001)       |
| Quintile 3                                        |                         | −0.001 (−0.002, 0)      |
| Quintile 4                                        |                         | −0.001 (−0.003, 0)      |
| Quintile 5<br>(highest affluence concentration)   |                         | Reference               |

<sup>a</sup> Model 1, spatial error model with row-standardized weights, adjusted for Omernik ecoregion (Eastern Temperate Forests was the reference group) and cumulative county-level rainfall from January–July 2001 (2001 NDVI models) or difference in cumulative rainfall between January–July 2001 and January–July 2011 (change in NDVI models). <sup>b</sup> Model 2 was additionally adjusted for 2000 census tract level variables: population density (persons/km<sup>2</sup>), percent renter-occupied housing units, and Index of Concentration at the Extremes for income. <sup>c</sup> Race/ethnicity  $\beta$  coefficients were standardized;  $\beta$  represents the change in NDVI for a 1-SD change in the proportion of the census tract populated by the relevant racial/ethnic group. <sup>d</sup> Reference group for American Indians, Asians, Blacks, and Hispanics was non-Hispanic Whites; Hispanics were the reference group for non-Hispanic Whites

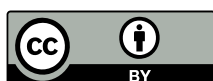

Supplement: Supplementary file 1 [file ijerph-14-01546-s001.pdf]
